# Supplementary material for: CAF to the rescue! Potential and challenges of combination antifungal therapy for reducing morbidity and mortality in hospitalized patients with serious fungal infections
Source: bioRxiv or medRxiv preprint supplement (doi:10.1101/2024.07.10.24310241), 2024-07-11
Supplement: Supplementary file [file media-2.pdf]

**Supplementary Figure 1.** Literature analysis of publications pertaining to laboratory testing of antifungal drugs in combinations against yeasts and molds

**Laboratory Methods**

Search Criteria: PubMed (1984-2024)

Generic Search Terms (All fields)

|                                                              |           |       |
|--------------------------------------------------------------|-----------|-------|
| Activity (Activities)                                        | 6,327,959 |       |
| Testing                                                      | 3,371,750 |       |
| Combination                                                  | 2,685,343 |       |
| In vitro                                                     | 1,927,465 |       |
| Susceptibility                                               | 642,043   |       |
| Antifungal                                                   | 232,801   |       |
| Antifungal combination                                       | 32,729    |       |
| Broth dilution                                               | 5,002     |       |
| Antifungal combination testing                               | 6,168     |       |
| In vitro antifungal combination                              | 5,269     |       |
| In vitro activity antifungal combination                     | 3,293     |       |
| Antifungal combination susceptibility                        |           | 1,873 |
| Antifungal combination susceptibility testing                | 1,117     |       |
| Antifungal combination testing broth dilution                | 76        |       |
| Antifungal combination susceptibility testing broth dilution | 37        |       |
| In vitro activity antifungal combination broth dilution      | 29        |       |

Google scholar

|                                               |         |
|-----------------------------------------------|---------|
| Antifungal combination testing (exact phrase) | 50 (10) |
|-----------------------------------------------|---------|

76+37+29 publications in English examined for the inclusion of approved antifungal drugs and QC strains = 22 studies
