# Supplementary material for: CAF to the rescue! Potential and challenges of combination antifungal therapy for reducing morbidity and mortality in hospitalized patients with serious fungal infections
Source: bioRxiv or medRxiv preprint supplement (doi:10.1101/2024.07.10.24310241), 2024-07-11

## Appendix

Keywords used for the PubMed Search strategy:

#1

((("candida"[Title/Abstract] OR "candidiasis"[Title/Abstract]) AND "combination therapy"[Title/Abstract] AND 2003/01/01:3000/12/31[Date - Publication]) OR ((("candida"[Title/Abstract] OR "candidiasis"[Title/Abstract]) AND "combination antifungal therapy"[Title/Abstract] AND 2003/01/01:3000/12/31[Date - Publication]))

#2

((("cryptococcus"[Title/Abstract] OR "cryptococcal"[Title/Abstract] OR "cryptococcosis"[Title/Abstract]) AND "combination therapy"[Title/Abstract] AND 2003/01/01:3000/12/31[Date - Publication]) OR ((("cryptococcus"[Title/Abstract] OR "cryptococcal"[Title/Abstract] OR "cryptococcosis"[Title/Abstract]) AND "combination antifungal therapy"[Title/Abstract] AND 2003/01/01:3000/12/31[Date - Publication]))

#3

((("aspergillus"[Title/Abstract] OR "aspergillosis"[Title/Abstract]) AND "combination therapy"[Title/Abstract] AND 2003/01/01:3000/12/31[Date - Publication]) OR ((("aspergillus"[Title/Abstract] OR "aspergillosis"[Title/Abstract]) AND "combination antifungal therapy"[Title/Abstract] AND 2003/01/01:3000/12/31[Date - Publication]))

#4

((("mucormycosis"[Title/Abstract] OR "mucorales"[Title/Abstract] OR "zygomycetes"[Title/Abstract] OR "zygomycosis"[Title/Abstract]) AND "combination therapy"[Title/Abstract] AND 2003/01/01:3000/12/31[Date - Publication]) OR ((("mucormycosis"[Title/Abstract] OR "mucorales"[Title/Abstract] OR "zygomycetes"[Title/Abstract] OR "zygomycosis"[Title/Abstract]) AND "combination antifungal therapy"[Title/Abstract] AND 2003/01/01:3000/12/31[Date - Publication]))

## Identification of CANDIDA studies via PubMed database

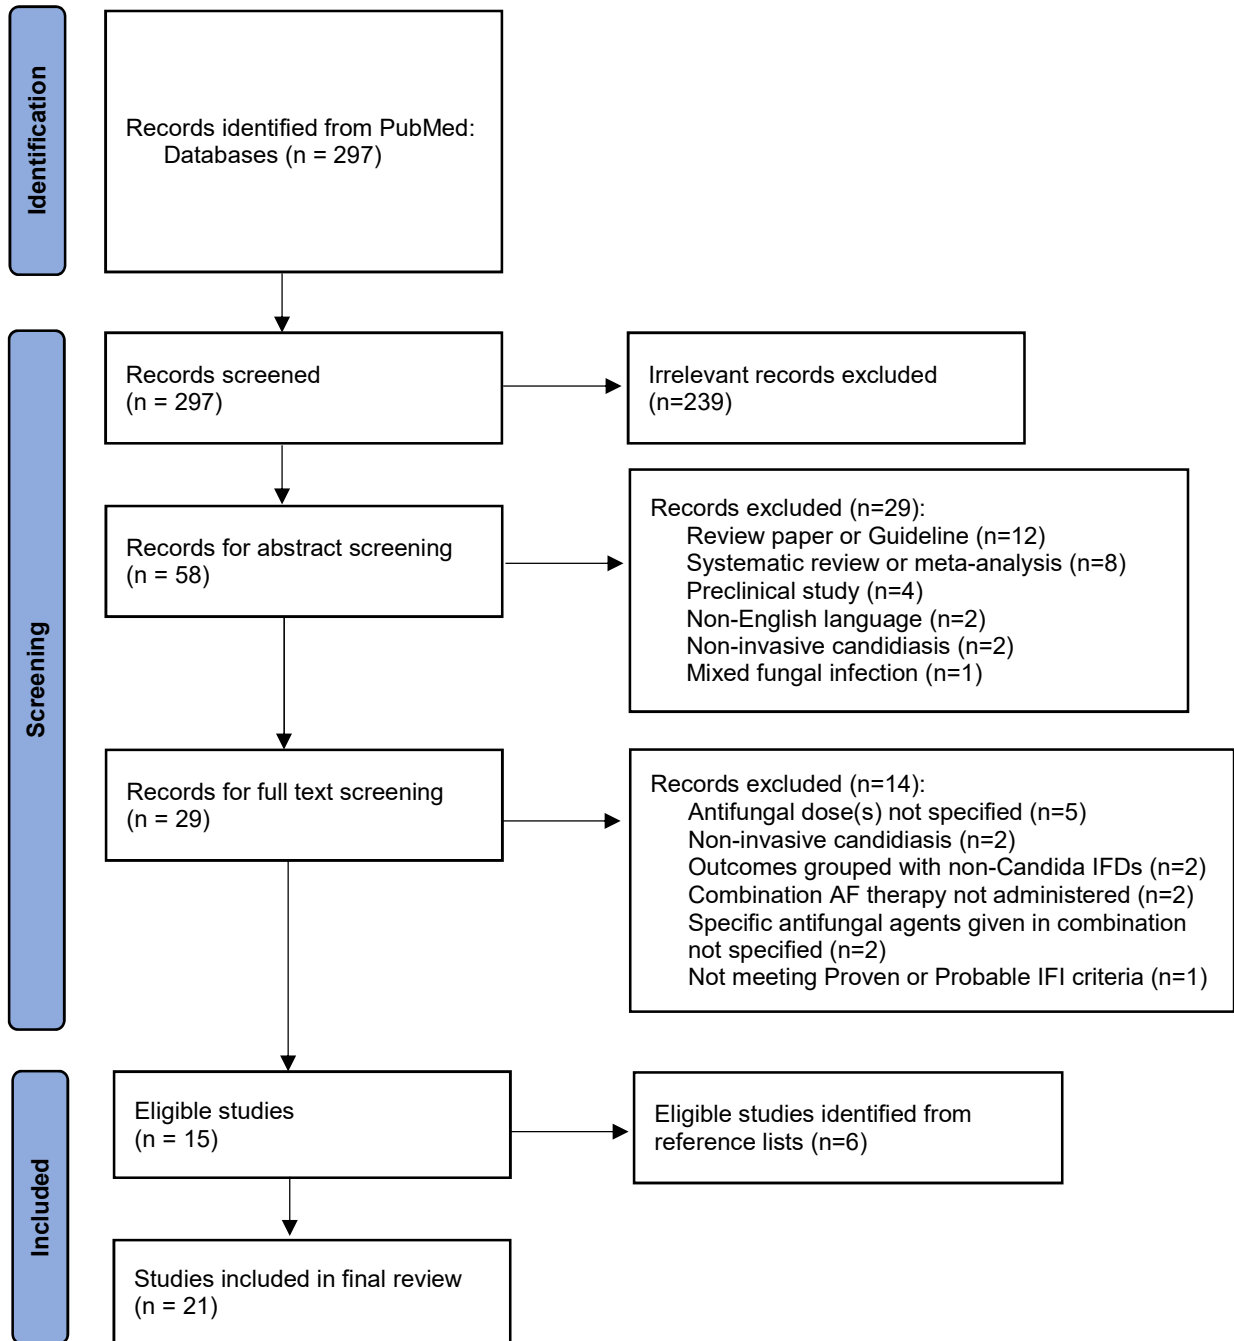

**Identification of CRYPTOCOCCUS studies via PubMed database**

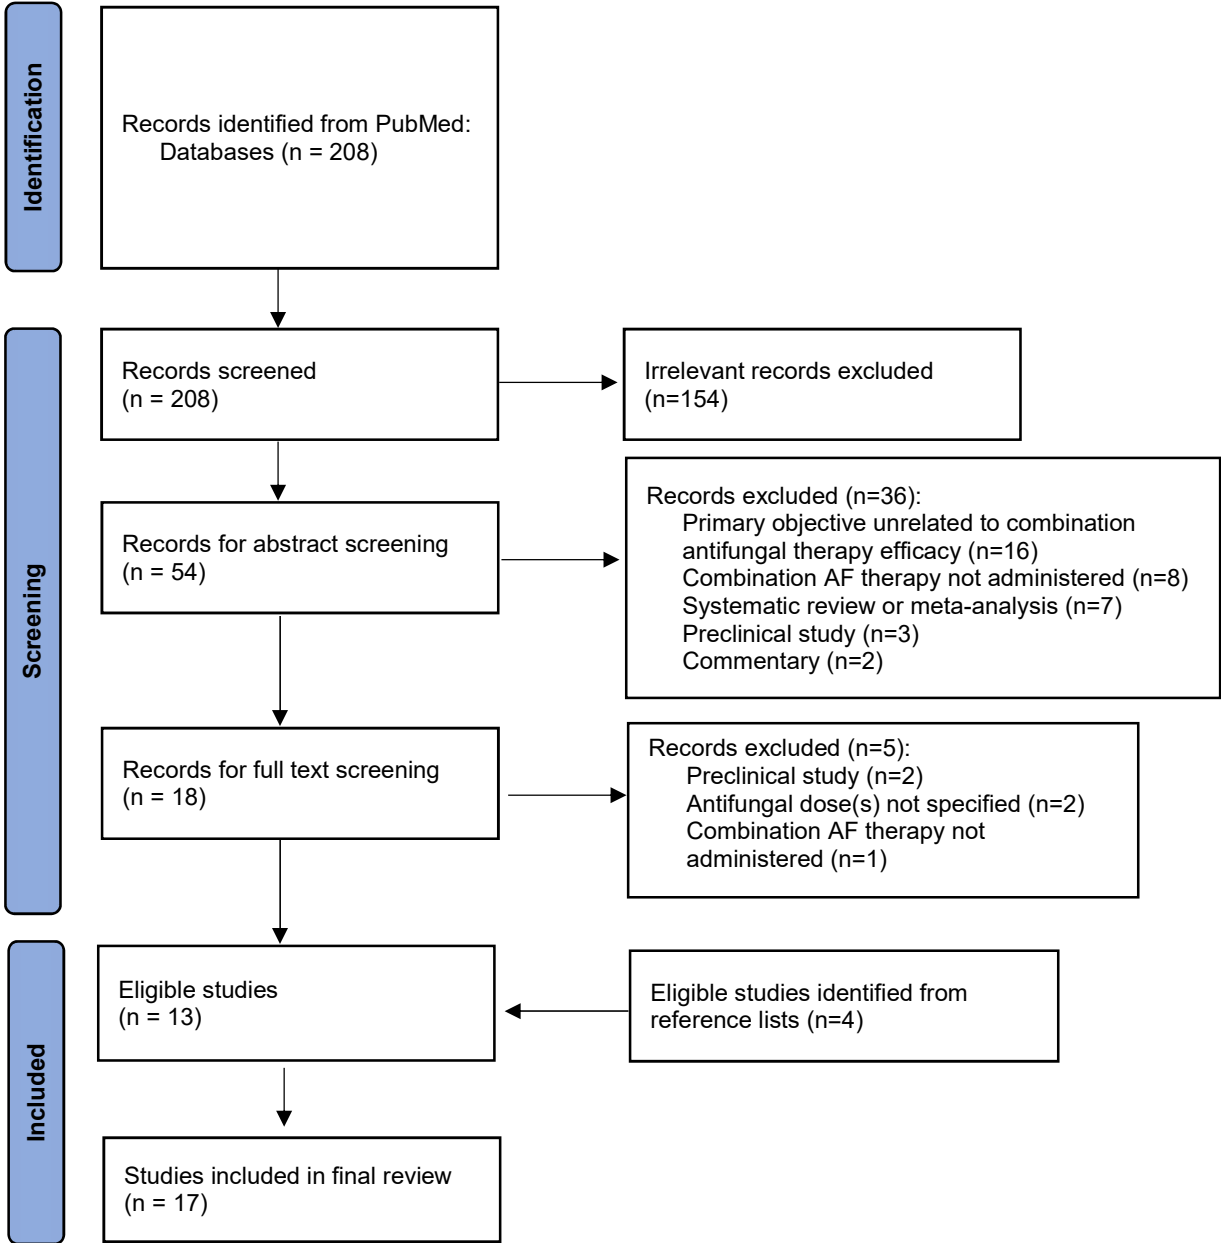

**Identification of ASPERGILLUS studies via PubMed database**

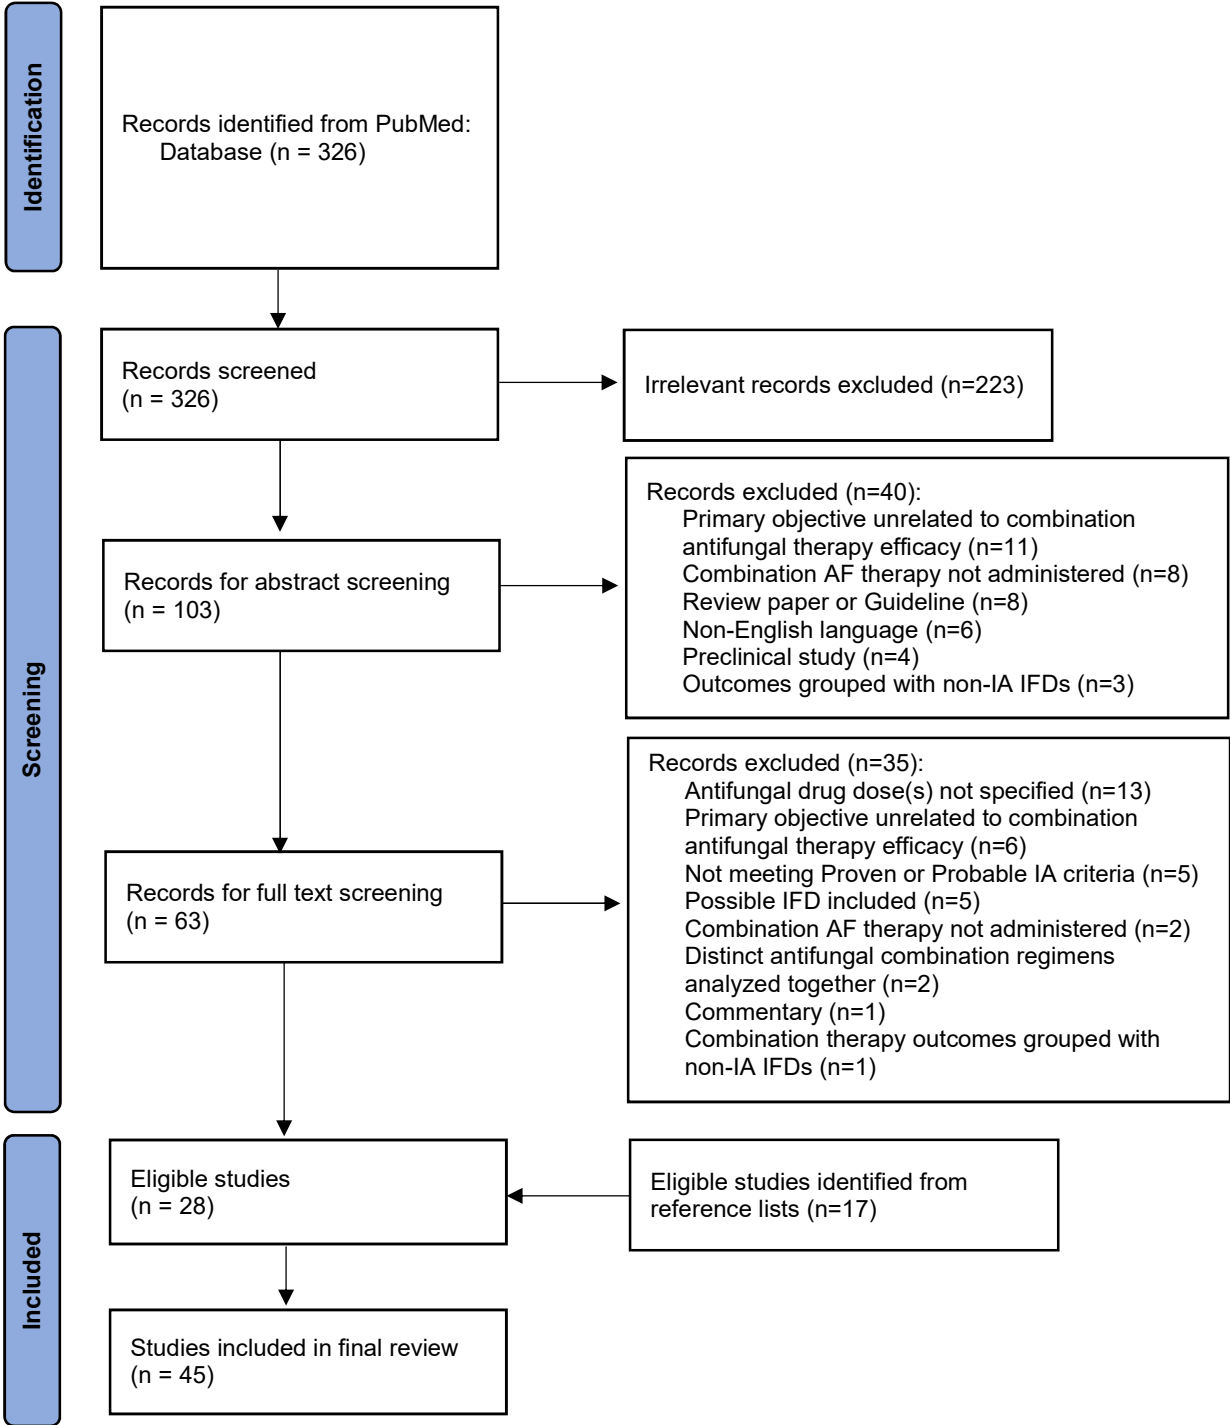

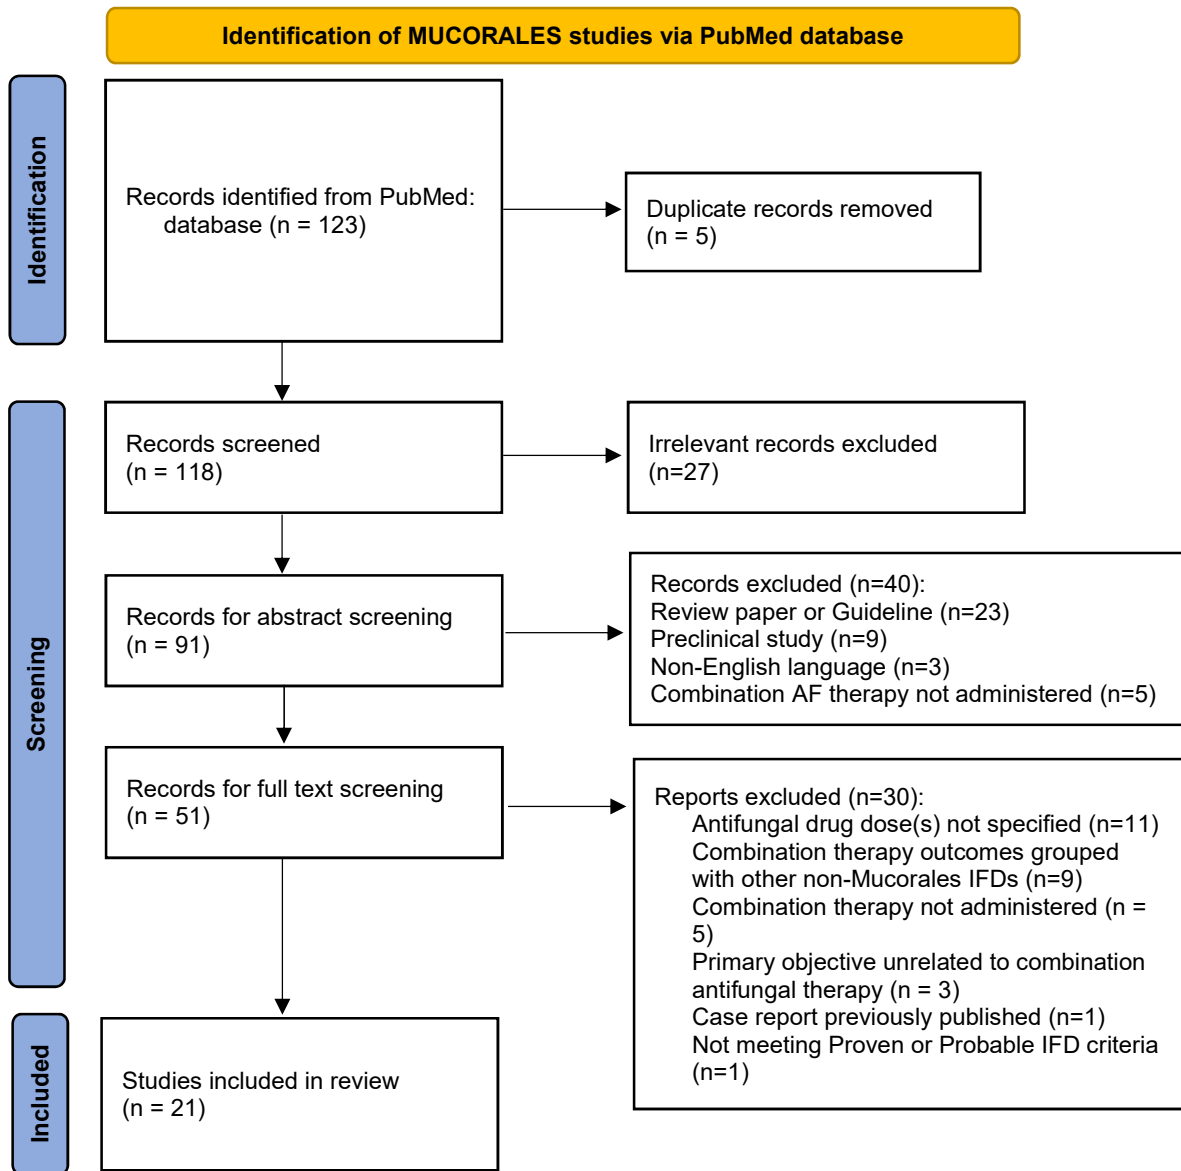

Supplement: Supplementary file [file media-3.pdf]
